# Supplementary material
Source: publisher site journal article supplement (https://www.dovepress.com/get_supplementary_file.php?f=384545.docx)
Supplement: Supplementary file 1 [file get_supplementary_file.php]

**Supplementary Table 1: Outlier Assessment Using the Tukey Method**

| **Biometer** | **Cataract Density** | **Q1** | **Q3** | **IQR** | **Lower Limit** | **Upper Limit** |
| --- | --- | --- | --- | --- | --- | --- |
| SS-OCT w/ORT | Dense Patients | 0.82 | 1.25 | 0.43 | 0.18 | 1.90 |
| OLCR | 1.38 | 1.86 | 0.48 | 0.67 | 2.57 |
| PCI | 1.35 | 2.04 | 0.69 | 0.32 | 3.07 |
| SS-OCT | 1.05 | 1.50 | 0.45 | 0.39 | 2.16 |
| SS-OCT w/ORT | Non-dense Patients | 0.82 | 1.04 | 0.22 | 0.49 | 1.38 |
| OLCR | 1.32 | 1.70 | 0.38 | 0.74 | 2.27 |
| PCI | 1.39 | 1.95 | 0.56 | 0.55 | 2.80 |
| SS-OCT | 1.01 | 1.29 | 0.28 | 0.59 | 1.71 |

SS-OCT w/ORT: Swept-source optical coherence tomography (SS-OCT) biometer integrated with operating room technologies, OLCR: Optical low coherence reflectometry, PCI: Partial coherence interferometry, Q1: Lower quartile, IQR: Interquartile range (Q2 or middle), Q3: Upper quartile

**Supplementary Table 2: Average Acquisition Time and Rate for Successful and Non-Successful Biometry (i.e., Acquisition Failure) Measurements Leveraged for Time-Efficiency Model, by Cataract Density**

| **Biometer** | **Dense Cataracts** | | | | **Non-Dense Cataracts** | | | |
| --- | --- | --- | --- | --- | --- | --- | --- | --- |
| **Successful Biometry** | | **Non-Successful Biometry** | | **Successful Biometry** | | **Non-Successful Biometry** | |
| **Acquisition Time** | **Rate** | **Acquisition Time** | **Rate** | **Acquisition Time** | **Rate** | **Acquisition Time** | **Rate** |
| **SS-OCT w/ORT** | 1.10 | 100% | N/A | N/A | 0.96 | 100% | N/A | N/A |
| **OLCR** | 1.69 | 90% | 1.66 | 10.0% | 1.50 | 99% | 1.63 | 1.0% |
| **PCI** | 1.71 | 74% | 1.82 | 25.6% | 1.68 | 95% | 1.75 | 5.1% |
| **SS-OCT** | 1.29 | 94% | 1.85 | 5.6% | 1.16 | 100% | N/A | N/A |

Notes: SS-OCT w/ORT: Swept-source optical coherence tomography (SS-OCT) biometer integrated with operating room technologies, OLCR: Optical low coherence reflectometry

**Supplementary Table 3: Additional Time-Efficiency Model Inputs**

| **Practice Related Assumptions** | |
| --- | --- |
| Average Surgeon Walking Speed | 1.28 meters/second |
| Time Required for the Surgeon to Manually Mark Patients | Mean: 0.77; SD: 0.12 minutes |
| Manual Data Entry into Femtosecond Laser without Image Guidance | Mean: 0.39; SD: 0.02 minutes |
| Manual Data Entry into Aberrometer Cloud-based Database | Mean: 2.32; SD: 0.63 minutes |
| Data Transmission Times Using the Femtosecond Laser with Image Guidance | Mean: 0.22; SD: 0.05 minutes |
| Image-Guided Optical Microscope (Digital Marking) | Mean: 0.42; SD: 0.15 minutes |

SD: Standard Deviation
